22 significantly higher in the infected cotton leaves as compared to the healthy cotton leaves. While  
23 the amount of antioxidant metabolites like total phenolic contents (TPC) and total flavonoid  
24 contents (TFC) were higher in healthy cotton leaves as compared to the infected leaves.

25 **Keywords:** Cotton leaf curl disease, Antioxidants, Catalase, Peroxidase, Superoxide dismutase

## 26 **Introduction**

27 The upland cotton belongs to the family Malvaceae and cultivated since ancient times in  
28 warmer parts of the world. The crop is mainly cultivated for its precious fiber but it also contributes  
29 80% share to oil production of Pakistan in addition to its lint [1]. Pakistan is the 4<sup>th</sup> largest cotton  
30 producing country of the world and prominent cotton yarn exporter of the world. The cotton crop  
31 is considered backbone of national economy as it is cultivated on the area of 3 million hectares in  
32 the country [2]. The economy of Pakistan greatly depends on cotton and cotton products. It has  
33 less than 10% share in agriculture value but provide about 2% share to the GDP of the country [3].  
34 It is economically most important crop of the country contributing up to 60 % of total exports and  
35 having largest value chain employing 50% of total industrial labor from field to the final valuable  
36 product [4]. The single crop provides the livelihood to the millions of farmers, agricultural labor,  
37 industrial labor and traders [5]. There are multiple biotic and abiotic factors that affect the yield of  
38 cotton. Among biotic factors, insect pests and plant diseases are leading challenges to the  
39 sustainable cotton cultivation. In Indian subcontinent especially the Pakistan “the cotton leaf curl  
40 disease” is the major dilemma to cotton crop since last few decades. The disease also deteriorate  
41 the quality of fiber by affecting traits like percentage of ginning out turn, fiber fineness, staple  
42 length, fiber uniformity index, fiber bundle strength and maturity ratio due to the changes in  
43 metabolites (cellulose, pectin, waxes and proteins) composition in fiber in addition to the effect on  
44 total crop yield [6].

45           The reactive oxygen species (ROS) are not always harmful and toxic for the plants but also  
46 perform special assigned role during development and regulation of metabolism of plant. ROS  
47 may also act as indispensable signal molecules in plant biological system such as in response to  
48 high light [7], cell cycle regulation [8], germination of seed [9], development of root system [10]  
49 and during pathogenic infection [11]. The aerobic organisms to counteract oxidative stress caused  
50 by ROS produce antioxidant enzymes and antioxidant compounds. ROS comprises of molecular  
51 oxygen ( $\cdot\text{O}^-$ ), superoxide radical ( $\cdot\text{O}_2^-$ ), hydroxyl radical ( $\cdot\text{OH}$ ) and hydrogen peroxide ( $\text{H}_2\text{O}_2$ )  
52 produced during oxidation/reduction (redox) reactions of aerobic metabolism as bi-products [12].  
53 To detoxify ROS, there are three antioxidant enzymes with key roles in plants. The superoxide  
54 dismutase (SOD) converts  $\cdot\text{O}_2^-$  to  $\text{O}_2$  and  $\text{H}_2\text{O}_2$ . The  $\text{H}_2\text{O}_2$  is then degraded by catalase and  
55 peroxidases [13]. Catalases have higher rate of reaction and low affinity to  $\text{H}_2\text{O}_2$  as compared to  
56 that of peroxidases which have higher affinity and can even detoxify  $\text{H}_2\text{O}_2$  in lower concentrations  
57 [14].

58           Phenolic metabolites are important plant constituents including phenolic acids, flavonoids,  
59 stilbenes, lignins, lignans and tannins etc. [15]. These compounds are very good electron donors  
60 and contribute their role as antioxidants [16]. Flavonoids are versatile secondary metabolites with  
61 polyphenolic molecular structure and low molecular weight. They are widely distributed in plants  
62 and perform diverse physiological functions in plants especially under biotic and abiotic stress.  
63 The diverse functions perform by these biomolecules are protective role against salt stress [17],  
64 drought stress [18], partial detoxification of ROS [19, 20]. Enormous flavonoids have also been  
65 characterized with diverse biological roles for example, shield against ultra violet radiation,  
66 signaling during plant microbe interaction for nodulation [21], defense against pest and  
67 phytopathogens [22], male fertility of plant, production of visual signals by coloring the flowers

68 to attract pollinators [23] and in transportation of hormones from one part of plant to the other.  
69 Few additional functions are protection against photo-radiation and enhancement of nutritional  
70 retrieval efficiency during senescence [24].

71 The plant response to elicitors is the developing field of research in plant physiology.  
72 Among commonly used elicitors are salicylic acid, methyl salicylate, benzothiadiazide, benzoic  
73 acid and chitosan etc. which activate different defense related enzymes and alter the production of  
74 phenolic compounds [25]. These compounds stimulate the interaction between pathogens and  
75 plants that subsequently triggers plant's defense system which constrain the invasion of pathogenic  
76 viruses. The tannins and phenols are well studied examples and these biomolecules control  
77 resistance genes regulation [26]. The role of these biochemical metabolites is crucial in infection  
78 of CLCuD and thus survival of plant under stress. The study of these important biomolecules can  
79 provide useful information regarding host defense mechanism against viral infection. In the present  
80 study, we have compared the activity of antioxidant enzymes as well as flavonoids and total  
81 phenolic contents in the leaves of healthy cotton plants and CLCuD infected cotton plants.

## 82 **Materials and Methods**

83 This research work was carried out at Medicinal Biochemistry Lab, Department of  
84 Biochemistry, University of Agriculture, Faisalabad.

### 85 **Sample collection**

86 The leaf samples were collected randomly from eight locations of cotton growing areas of  
87 Punjab, Pakistan, during field survey in September 2019. Total six sample (three infected and three  
88 healthy) from each location were collected. The samples were collected in labeled polyether zipper

89 bags and preserved in thermophore box containing ice bricks. The samples were stored in -70°C  
90 freezer for long term storage.

### 91 **Quantification of Antioxidant Enzymes**

92 The leaf samples (10 mg) of each plant were taken in 2 mL tubes and 1 ml of pre-cooled  
93 50 mM potassium phosphate buffer was add to the tubes containing leaf samples and samples were  
94 grounded using bead beater (Omni bead rupture, Canada). The samples were centrifuged for 10  
95 minutes at 13000 rpm to pellet the leaf contents. The supernatant containing the cell lysate were  
96 collected in fresh prelabelled eppendorf tubes.

### 97 **Catalase Estimation**

98 The catalase is present in almost every aerobic cell and detoxify the H<sub>2</sub>O<sub>2</sub>. The enzyme  
99 activity was determined in the leaf samples using Amplex Red Catalase Assay kit (A22180).

### 100 **Reaction Mixture and Standard curve**

101 The reaction mixture was prepared using solution provided in the kit and according to  
102 instructions of manufacturer. The 20 mM H<sub>2</sub>O<sub>2</sub> was prepared by diluting 23 µl of 3 % H<sub>2</sub>O<sub>2</sub> in 977  
103 µl of deionized water (dH<sub>2</sub>O) and for final use 40 µM H<sub>2</sub>O<sub>2</sub> was prepared using 10 µl of 20 mM in  
104 490 µl of 1X reaction buffer. The 260 µg Amplex Red reagent was dissolved in 100 µl of  
105 dimethylsulfoxide (DMSO) to prepare the working solution of Amplex Red. 100 µl of 1 X reaction  
106 buffer was added to the horseradish peroxide (HRP) vial to get 100 U/ml solution. The working  
107 reaction mixture of Amplex Red and HRP 100 µM and 400 mU, respectively was prepared from  
108 previously prepared solutions. To prepare standards, 100 µl of dH<sub>2</sub>O was added to the vial  
109 containing catalase and eight standards ranging from 0 to 4 U/ml were prepared using 1 X reaction  
110 buffer. The standard curve was plotted using these standard solutions of catalase (Supplementary

111 Figure S1). 25  $\mu$ l of each standard was pipetted in three wells of ELISA plate and 25  $\mu$ l of 40  $\mu$ M  
112  $H_2O_2$  was added to each well using multichannel pipette. The mixture was allowed to react for 3  
113 minutes at 37°C followed by addition of 50  $\mu$ l Amplex Red reagent and horseradish peroxidase  
114 working solution to make the reaction mixture to 100  $\mu$ l. The plate was incubated at 25 °C for 5  
115 minutes to complete the reaction and the incubation time was optimized after multiple trails.

116 The absorbance of the reaction plate was measured at 560 nm by using micro well plate  
117 reader (BioTek,  $\mu$ -Quant<sup>TM</sup>, USA). The plant samples were arranged in the racks according to  
118 descending order and kept at room temperature before use. The assay was carried out using 25  $\mu$ l  
119 sample and 25  $\mu$ l of 40  $\mu$ M  $H_2O_2$  and plate was placed at 37 °C for 3 minutes. Amplex Red and  
120 HRP solution were added and plate was placed at 25 °C for 5 minutes before measurement of  
121 absorbance.

## 122 **Calculation of Enzyme activity**

123 To calculate the activity of catalase in our samples linear regression equation ( $Y=-0.0002X$   
124  $+ 0.8033$ ) obtained from standard curve was used (Supplementary Figure S1). The U/mL units  
125 were converted to the U/g of sample weight by multiplying with dilution factors and expressed in  
126 (Table 1). 1 U of catalase is described as the quantity of enzyme which decomposes 1.0  $\mu$ M  $H_2O_2$   
127 per minutes at optimum conditions of pH and temperature.

## 128 **Peroxidase Estimation**

129 Peroxidase (PODs) detoxify the  $H_2O_2$  and other hydro peroxides by catalyzing the  
130 reduction of ascorbate (AsA), monodehydroascorbate (MDHA), glutathione (GSH) or  
131 dehydroascorbate (DHA) depending upon the peroxidase and shielding cells from oxidative  
132 damage [27]. PODs were estimated as described by Siddique and co workers in cotton leaf samples

133 as with slight modification. In this assay guaiacol is used which produce brown color upon  
134 oxidation [28].

### 135 **Reaction Mixture**

136 The reaction mixture was prepared in 50 mM potassium phosphate buffer. The calculated  
137 volume of H<sub>2</sub>O<sub>2</sub> and guaiacol were added to the buffer to make reaction mixture with final  
138 concentrations 40 mM and 20 mM, respectively. The 240 µl of reaction mixture was added to each  
139 well of micro well plate and the samples to be estimated were pored to another plate in predefined  
140 order. The samples were added to the reaction mixture with the help of multichannel pipette and  
141 time was recorded on the mobile stopwatch. Few wells were loaded with only phosphate buffer  
142 instead of sample to get the blank values. The absorbance was measured at 470 nm after every 60  
143 sec using ELISA plate reader (BioTek, µ-Quant™, USA) and 6 reading were recorded.

### 144 **Calculations**

145 The PODs activity was estimated by the difference of absorbance. The first minutes  
146 readings were used after subtracting from blank reading. The  $\Delta A_{470}/\text{min}$  is the absorbance after  
147 first minute minus absorbance of blanks. The following formula was used to calculate enzyme  
148 activity in U/mL. Finally the values are expressed as U/g of fresh weight and given in (Table 1).

149

$$150 \quad \quad \quad (\Delta A_{470}/\text{min}) \times 1000$$
$$151 \quad \text{Peroxidase activity in U/mL} = \frac{\quad}{26.6 \quad \times 10/240}$$

153

154 The 26.6 is H<sub>2</sub>O<sub>2</sub> extinction coefficient, and 10/240 is dilution factor as 10 µl of sample  
155 was added to 240 µl of reaction mixture and there are 1000 µl in 1 mL.





178           Where, sample absorbance is after 30 sec so the values obtained were multiplied by 2 to  
179 obtain 1 minute activity of the enzyme.

## 180 **Estimation of Non-Enzymatic Metabolites**

181           The fresh leaves of healthy and virus infected cotton leaves were used to estimate the non-  
182 enzymatic antioxidant metabolites (total phenolic compounds and total flavonoid contents).

## 183 **Determination of Total Phenolic Contents (TPC)**

184           The TPC of cotton leaves (infected and healthy) collected from different locations were  
185 determined as described by [29] with minor modifications. The leave samples (10mg each) were  
186 homogenized in 80% acetone in bead beater (Omni Bead Ruptor 24, by Omni International  
187 Canada) in 2 mL tubes and homogenates were centrifuged at 10000 rpm for 10 minutes.  
188 Supernatant was collected in new eppendorf and use for TPC estimation.

## 189 **Reaction Mixture and Standard Curve**

190           The reaction mixture was prepared by dilution 2 mL of Folin-Ciocalteau's reagent in 16  
191 mL of distilled water. The each well of ELISA plate were loaded with 50  $\mu$ l of reaction mixture  
192 and 5  $\mu$ l of Gallic acid standers were added and mixed in 3 consecutive wells each to get the mean  
193 value for standard curve. The plate was incubated at room temperature for 15 minutes. The 200  $\mu$ l  
194 saturated solution of sodium carbonate ( $\text{Na}_2\text{CO}_3$ ) was added to the each well and incubated at room  
195 temperature for half hour. The absorbance was measured at 750 nm by ELISA plate reader  
196 (BioTek,  $\mu$ -Quant<sup>TM</sup>, USA). The standard curve was obtain using the mean value of these readings  
197 (Supplementary Figure S2). The TPC of cotton leave samples were determined in the same way  
198 using 5  $\mu$ l of supernatant. The value of TPC in our samples linear regression equation ( $Y= 0.0025$

199  $X + 0.0206$ ) obtained from was standard curve was used (Supplementary Figure S2). The values  
200 are expressed as mg/g of fresh weight Gallic acid equivalence (GAE) and given in (Table 1).

### 201 **Determination of Total Flavonoid Contents (TFC)**

202 Flavonoids are phenolic compounds have antioxidant properties. The flavonoids contents  
203 were estimated in the cotton leaves as described by Chanda and Dave with few modifications. The  
204 fresh leave samples (10mg each) were homogenized in (200  $\mu$ l) 50 to 80% ethanol in bead beater  
205 (Omni Bead Ruptor 24, by Omni International Canada) in 2 mL tubes and homogenates were  
206 centrifuged at 10000 rpm for 10 minutes. Supernatant was collected in new eppendorf and used  
207 for TFC estimation and stored in freezer [30].

### 208 **Reaction Mixture and Standard Curve**

209 The reaction mixture was prepared by adding 70  $\mu$ l sample and standard extract each well  
210 of ELISA plate followed by addition of 70  $\mu$ l of sodium Nitrite,  $\text{NaNO}_2$  (5%) and incubated  
211 mixture for 5 Minutes. The 15  $\mu$ l of aluminum chloride,  $\text{AlCl}_3$  (10%) was added to each well and  
212 incubated at room temperature for 10 mins followed by addition of addition 70  $\mu$ l of 1M sodium  
213 hydroxide (NaOH) to each well. The plates were incubated for 10 minutes before recoding  
214 absorbance at 415 nm by ELISA plate reader (BioTek,  $\mu$ -Quant<sup>TM</sup>, USA). Quercetin standers  
215 were used to get standard curve (Supplementary Figure S3). The standard curve was obtained  
216 using the mean value of these readings. The value of TFC in our samples was determined using  
217 linear regression equation ( $Y = 0.0005X + 0.0055$ ) obtained from standard curve (Supplementary  
218 Figure S3). The values are expressed as mg/g and given in (Table 1).

### 219 **Results and Discussion**

220 The homeostasis of ROS is dependent on its production and scavenging activity of anti-  
221 oxidant enzymes and other anti-oxidant compounds [31]. There are two types of defense  
222 mechanism against ROS in nature, enzymatic and non-enzymatic. The enzymatic defense system  
223 has variety of scavenger enzymes in plants but there are three main enzymes responsible for  
224 enzymatic defense against ROS viz. catalase, peroxidases and superoxide dismutase. The non-  
225 enzymatic defense includes compounds with intrinsic antioxidant properties and these compounds  
226 are either water soluble such as phenolic compounds, flavonoids, ascorbate glutathione or fat  
227 soluble like carotenoids and tocopherols. These antioxidant compounds act as electron donor to  
228 reduce ROS to less reactive molecules which are not that harmful to cell. Under stress conditions,  
229 the ROS homeostatic defense system becomes disturbed due to increased ROS production. To  
230 minimize the damaging effect of ROS, the aerobic organisms up regulate the both enzymatic and  
231 non-enzymatic antioxidant defense systems [32]. Present study compared the activity of  
232 antioxidant enzymes and some antioxidant compounds under stress caused by cotton leaf curl  
233 disease.

### 234 **Catalase**

235 Catalase is an antioxidant enzyme present in almost every aerobic cell in abundance and  
236 detoxify hydrogen peroxide ( $H_2O_2$ ) a toxic product of aerobic metabolism and ROS produced by  
237 pathogens or response to pathogens. This enzyme protect cells from toxicity of  $H_2O_2$  which can be  
238 lethal if not degraded [33]. It converts two molecules of  $H_2O_2$  into water and molecular oxygen  
239 [34].

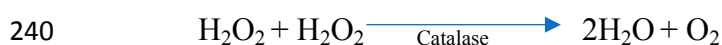

241 Catalase is tetrameric protein of 240 kDa and each polypeptide of 60 kDa in weight and  
242 similar to each other containing a single ferriprotoporphyrin [35]. In the cell it scouts for hydrogen  
243 peroxide and have highest turnover number and a single tetramer can convert millions of H<sub>2</sub>O<sub>2</sub> to  
244 water and oxygen in one second. This reaction took place in two steps during first step H<sub>2</sub>O<sub>2</sub>  
245 molecule oxidizes the heme and one porphyrin radical generated and in second step another H<sub>2</sub>O<sub>2</sub>  
246 molecules reduces the porphyrin radical to enzyme resting state producing one molecule of oxygen  
247 and two water molecules [36]. In this study the catalase activity in infected cotton leaves is  
248 significantly higher than that of healthy leaves as shown in Figure 1 which suggests the increase  
249 of ROS in infected cell as compared to the normal and healthy cells.

250 Catalase activity was recorded increased in cotton leaf curl infected leaves and these  
251 findings are in agreement with that of Siddique et al. [28]. These finding are in contrast with  
252 Riedle-Bauer [37] findings that cucumber mosaic virus does not affect catalase activity in  
253 cucumber plants. [38] Ahammed et al. also reported the enhanced activity of catalase under iron  
254 stress which is in accordance with our results that the under stress the activity of catalase increases.  
255 The increased catalase activity in rice under drought stress is also reported by the [39] which is  
256 accordance with our results in this study. [40] Hasanuzzaman et al. also reported the significant  
257 increase in catalase activity under abiotic stress which supports our results that the activity of  
258 catalase enhanced during stress. These finding suggests that during virus infection the ROS  
259 synthesis increases and subsequently plants enzymatic antioxidant defense system also activated  
260 to cope with the stress condition.

## 261 **Peroxidase**

262 Peroxidases (PODs) are the antioxidant enzymes present in almost every aerobic cell and  
263 among the first enzymes respond to phytopathogens in addition to detoxification of hydrogen

264 peroxide (H<sub>2</sub>O<sub>2</sub>) [41]. PODs are involved in Lignification, regulation of cell wall elongation,  
265 suberification, wound healing and resistance against phytopathogens [42]. The reaction of PODs  
266 are given below

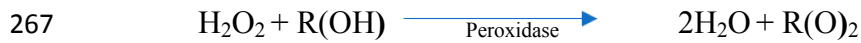

268 Where, “R” may be Ascorbate (AsA), monodehydroascorbate (MDHA), glutathione  
269 (GSH) or dehydroascorbate (DHA) depending upon the peroxidase. Peroxidases counteract the  
270 increased hydrogen peroxide along with catalases and plays critical role in the antioxidant defense  
271 response of plant [43, 44]. The protective role of peroxidases have been reported against plant  
272 disease and tissue injuries [45]. These have greater affinity for H<sub>2</sub>O<sub>2</sub> than that of catalase and  
273 present in cytoplasm and mitochondria. In this study the catalase activity in infected cotton leaves  
274 is significantly higher than that of healthy leaves as shown Figure 1 which suggests that, this group  
275 of enzymes have role in plant defense against pathogens.

276 These finding of enhanced PODs activity in infected cells is in accordance with the finding  
277 of [46] who observed immediate increase of PODs level after inoculation of virus. [47] also  
278 observed increased PODs activity after inoculating tomato leaves with *A. alternate* leaf blight  
279 causing pathogen which is also in accordance with our results the higher expression of PODs after  
280 infection. Our results are also in agreement with [28] for the increased activity of PODs in plants  
281 grafted with virus infected scion. The increased PODs activity in rice under drought stress is also  
282 reported by the [39] which is accordance with our results in this study. These finding suggests that  
283 during virus infection the activity of PODs also increases as defense against pathogens.

284

285

## 286 **Superoxide Dismutase (SOD)**

287           Superoxide dismutase are the metalloproteins which catalyze the dismutation of superoxide  
288 ( $O_2^-$ ) radicals to molecular oxygen or  $H_2O_2$ . The SODs are classified into three types according to  
289 the metal ion association and important part of cells antioxidant defense system [48]. The  $H_2O_2$  .  
290 produce during this reaction is catalyzed to water and oxygen by catalases and peroxidases. The  
291 reaction scheme is given below.

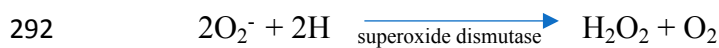

293           SODs are the first line defense of cell against ROS and also plays important role against  
294 the pathogenic infections. The SOD activity in infected cotton leaves is significantly higher than  
295 that of healthy leaves as shown in Figure 1. These findings suggests that, this enzyme have role in  
296 plant defense against pathogens. These finding of enhanced SOD activity in infected cells is in  
297 contrast with the finding of [46] who observed decrease of SODs activity after inoculation of virus  
298 and with [28] for the increase activity of SODs in plants grafted with virus infected scion. These  
299 findings are in accordance with [39] who reported increased SOD activity in rice under drought  
300 stress. [40] also reported the significant increase in SOD activity under abiotic stress which  
301 supports our results that the activity of SOD enhanced during stress. We can conclude that SOD  
302 activity altered during stress.

## 303 **Total Phenolic Contents (TPC)**

304           Polyphenols of plants are distinct group of phenolic compounds (phenolic acids,  
305 flavonoids, stilbenes, lignins etc.) having ideal structure for scavenging of free radicals. Their  
306 property of electron or hydrogen donation makes them good antioxidant compounds [49]. These  
307 phenolic compounds enhance the mechanical strength of cell wall of the host cells may be by

308 synthesis of lignin and suberin and form a physical barrier for the pathogens [50, 51]. In this study  
309 the amount of Phenolic compounds is significantly reduced in infected plants shown in Figure 1.  
310 A significant difference of total phenolic contents observed between the samples from different  
311 locations this might be due the difference of cultivars or climatic conditions affected accumulation  
312 of these compounds. These results are in accordance with the results of [28] who reported that  
313 reduction of phenolic compounds in infected/inoculated cotton cultivars as compared to the  
314 healthy/non inoculated plants. Chatarjee [52] reported that virus infected Mesta plants have lower  
315 total phenolic contents as compared to that of healthy plants and also observed that the resistant  
316 cultivars have high level of total phenolic compounds as compared to the susceptible varieties the  
317 first part is in accordance with our results of this study. (Chaubey & Mishra, 2020) also reported  
318 that the leaf curl disease to chili also reduced the total phenolic contents in the infected leaves as  
319 compared to the healthy leaves which is in agreement with our findings in this study. It can be  
320 concluded that in the infected leaves the level of total phenolic compounds drop significantly as  
321 compared to that of healthy plants. Moreover, the climatic condition also effect the level of these  
322 compounds.

### 323 **Total Flavonoid Contents (TFC)**

324 Flavonoids are phenolic compounds have antioxidant properties and can scavenge free  
325 radicals as well as chelate the metal ions (Iron, copper etc.) subsequently inhibiting the enzymes  
326 responsible for generation of free radicals [53]. These compounds occur in the form of glycosides  
327 in plants and hypothesized to perform several roles like photoproduction, hormonal translocation  
328 modulation and sequestration of ROS [54]. Flavonoids can scavenge all known ROS depending  
329 on their structure. During stress condition the level of TFC may be altered as in our study. The  
330 level of flavonoids in CLCuD infected plants has dropped little as compared to healthy leaves as

331 shown in Figure 1. There might be difference of varieties which express different flavonoid contents  
332 and the information of the cotton varieties is not available. The difference might be due to the  
333 different climatic condition as the samples were collected from different locations. The overall  
334 results shows that the flavonoid content in the infected leaves is lower than that of healthy leaves  
335 from the same field. These results are in accordance with that of [28] who perform the assay for  
336 the cotton leaf curl disease infected plants and healthy plants in addition to that of disease resistant  
337 cotton cultivars which express more flavonoid contents than that of susceptible cultivars. It can be  
338 concluded that in the infected leaves the level of total flavonoid contents drop significantly as  
339 compared to that of healthy plants. Moreover, the climatic condition also effect the level of these  
340 compounds.

#### 341 **Conclusion**

342 These findings suggests that antioxidant enzymes catalase, peroxidases and superoxide  
343 dismutase along with antioxidant compounds constitute the first line of defense with key role in  
344 total defense mechanism of biological system. The activity of all antioxidant enzymes during cotton  
345 leaf curl disease increases and the level of antioxidant compounds decreased.

346

347

348

349

350

351



## 352References

- 353
- 354 1. Riaz M, Farooq J, Sakhawat G, Mahmood A, Sadiq M, Yaseen M. Genotypic variability for  
355 root/shoot parameters under water stress in some advanced lines of cotton (*Gossypium hirsutum*  
356 L.). *Genet Mol Res*. 2013;12(1):552-61.
- 357 2. Malik TH, Ahsan MZ. Review of the cotton market in Pakistan and its future prospects. *OCL*.  
358 2016;23(6):D606.
- 359 3. Sial KB, Kalhoro AD, Ahsan MZ, Mojidano MS, Soomro AW, Hashmi RQ, et al. Performance of  
360 Different Upland Cotton Varieties under the Climatic Condition of Central Zone of Sindh.  
361 *American-Eurasian Journal of Agricultural & Environmental Sciences*. 2014;14:1447-9.
- 362 4. Abbas S, Waheed A. Trade competitiveness of Pakistan: evidence from the revealed comparative  
363 advantage approach. *Competitiveness Review: An International Business Journal*. 2017.
- 364 5. Abbas S. Climate change and cotton production: an empirical investigation of Pakistan.  
365 *Environmental Science Pollution Research International*. 2020.
- 366 6. Farooq A, Farooq J, Mahmood A, Shakeel A, Rehman KA, Batool A, et al. An overview of cotton  
367 leaf curl virus disease (CLCuD) a serious threat to cotton productivity. *Australian Journal of Crop*  
368 *Science*. 2011;5(13):1823.
- 369 7. Mullineaux PM, Exposito-Rodriguez M, Laissue PP, Smirnoff N. ROS-dependent signalling  
370 pathways in plants and algae exposed to high light: comparisons with other eukaryotes. *Free*  
371 *Radical Biology Medicine*. 2018;122:52-64.

- 372 8. Liu Y, He C. Regulation of plant reactive oxygen species (ROS) in stress responses: learning from  
373 AtRBOHD. *Plant Cell Reports*. 2016;35(5):995-1007.
- 374 9. El-Maarouf-Bouteau H, Bailly C. Oxidative signaling in seed germination and dormancy. *Plant*  
375 *signaling*. 2008;3(3):175-82.
- 376 10. Sharma P, Jha AB, Dubey RS, Pessarakli M. Reactive oxygen species, oxidative damage, and  
377 antioxidative defense mechanism in plants under stressful conditions. *Journal of botany*.  
378 2012;2012.
- 379 11. O'Brien JA, Daudi A, Butt VS, Bolwell GP. Reactive oxygen species and their role in plant defence  
380 and cell wall metabolism. *Planta*. 2012;236(3):765-79.
- 381 12. Halliwell B. Reactive species and antioxidants. Redox biology is a fundamental theme of aerobic  
382 life. *Plant Physiology*. 2006;141(2):312-22.
- 383 13. Foyer CH, Noctor G. Redox regulation in photosynthetic organisms: signaling, acclimation, and  
384 practical implications. *Antioxidants & redox signaling*. 2009;11(4):861-905.
- 385 14. Panchuk II, Zentgraf U, Volkov RA. Expression of the Apx gene family during leaf senescence of  
386 *Arabidopsis thaliana*. *Planta*. 2005;222(5):926-32.
- 387 15. Kähkönen MP, Hopia AI, Vuorela HJ, Rauha J-P, Pihlaja K, Kujala TS, et al. Antioxidant activity  
388 of plant extracts containing phenolic compounds. *Journal of agricultural and food chemistry*.  
389 1999;47(10):3954-62.
- 390 16. Bendary E, Francis R, Ali H, Sarwat M, El Hady S. Antioxidant and structure–activity relationships  
391 (SARs) of some phenolic and anilines compounds. *Annals of Agricultural Sciences*.  
392 2013;58(2):173-81.

- 393 17. Chen S, Wu F, Li Y, Qian Y, Pan X, Li F, et al. NtMYB4 and NtCHS1 are critical factors in the  
394 regulation of flavonoid biosynthesis and are involved in salinity responsiveness. *Frontiers in plant*  
395 *science*. 2019;10:178.
- 396 18. Shojaie B, Mostajeran A, GHANADIAN M. Flavonoid dynamic responses to different drought  
397 conditions: amount, type, and localization of flavonols in roots and shoots of *Arabidopsis thaliana*  
398 L. *Turkish Journal of Biology*. 2016;40(3):612-22.
- 399 19. Cushnie TT, Lamb AJ. Antimicrobial activity of flavonoids. *International journal of antimicrobial*  
400 *agents*. 2005;26(5):343-56.
- 401 20. Brunetti C, Di Ferdinando M, Fini A, Pollastri S, Tattini M. Flavonoids as antioxidants and  
402 developmental regulators: relative significance in plants and humans. *International Journal of*  
403 *Molecular Sciences*. 2013;14(2):3540-55.
- 404 21. Singla P, Garg N. Plant flavonoids: Key players in signaling, establishment, and regulation of  
405 rhizobial and mycorrhizal endosymbioses. *Mycorrhiza-function, diversity, state of the art:*  
406 *Springer*; 2017. p. 133-76.
- 407 22. Mierziak J, Kostyn K, Kulma A. Flavonoids as important molecules of plant interactions with the  
408 environment. *Molecules*. 2014;19(10):16240-65.
- 409 23. Dudek B, Warskulat A-C, Schneider B. The occurrence of flavonoids and related compounds in  
410 flower sections of *Papaver nudicaule*. *Plants*. 2016;5(2):28.
- 411 24. Tyler KL, Fields B. *Mammalian reoviruses*. *Fields virology*, 4th ed Lippincott Williams & Wilkins,  
412 Philadelphia, Pa. 2001:1729-45.

- 413 25. Thakur M, Sohal BS. Role of elicitors in inducing resistance in plants against pathogen infection:  
414 a review. *International Scholarly Research Notices*. 2013;2013:International Scholarly Research  
415 Notices.
- 416 26. Thind S, Monga P, Kaur N, Cheema S. Analysis of some biochemical and micro-nutrient  
417 constituents of yellow mosaic virus infected moong. *Indian Journal of Virology*. 1996;12(2):157-  
418 9.
- 419 27. Schempp H, Hippeli S, Elstner EF. Plant stress: avoidance, adaptation, defense. Hock B, Elstner  
420 EF, CRC Press, New York. 2004:87-130.
- 421 28. Siddique Z, Akhtar KP, Hameed A, Sarwar N, Imran-Ul-Haq, Khan SA. Biochemical alterations  
422 in leaves of resistant and susceptible cotton genotypes infected systemically by cotton leaf curl  
423 Burewala virus. *Journal of Plant Interactions*. 2014;9(1):702-11.
- 424 29. Ainsworth EA, Gillespie KM. Estimation of total phenolic content and other oxidation substrates  
425 in plant tissues using Folin–Ciocalteu reagent. *Nature protocols*. 2007;2(4):875-7.
- 426 30. Chanda S, Dave R. In vitro models for antioxidant activity evaluation and some medicinal plants  
427 possessing antioxidant properties: An overview. *African Journal of Microbiology Research*.  
428 2009;3(13):981-96.
- 429 31. Polle A. Dissecting the superoxide dismutase-ascorbate-glutathione-pathway in chloroplasts by  
430 metabolic modeling. Computer simulations as a step towards flux analysis. *Plant physiology*.  
431 2001;126(1):445-62.
- 432 32. Apel K, Hirt HJARP. Reactive oxygen species: metabolism, oxidative stress, and signal  
433 transduction. 2004;55:373-99.

- 434 33. Hameed U, Zia-Ur-Rehman M, Herrmann H-W, Haider M, Brown JK. First report of Okra enation  
435 leaf curl virus and associated cotton leaf curl Multan betasatellite and cotton leaf curl Multan  
436 alphasatellite infecting cotton in Pakistan: a new member of the cotton leaf curl disease complex.  
437 *Plant Disease Archives of virology*. 2014;98(10):1447-.
- 438 34. Ighodaro O, Akinloye O. First line defence antioxidants-superoxide dismutase (SOD), catalase  
439 (CAT) and glutathione peroxidase (GPX): Their fundamental role in the entire antioxidant defence  
440 grid. *Alexandria journal of medicine*. 2018;54(4):287-93.
- 441 35. Surai PF. Selenium in nutrition and health: Nottingham university press Nottingham; 2006.
- 442 36. Chelikani P, Fita I, Loewen PC. Diversity of structures and properties among catalases. *Cellular*  
443 *Molecular Life Sciences CMLS*. 2004;61(2):192-208.
- 444 37. Riedle-Bauer M. Activities of antioxidant enzymes in cucumber plants infected with cucumber  
445 mosaic virus. *Phyton*. 1998.
- 446 38. Ahammed GJ, Wu M, Wang Y, Yan Y, Mao Q, Ren J, et al. Melatonin alleviates iron stress by  
447 improving iron homeostasis, antioxidant defense and secondary metabolism in cucumber. *Scientia*  
448 *Horticulturae*. 2020;265:109205.
- 449 39. Singh DP, Singh V, Gupta VK, Shukla R, Prabha R, Sarma BK, et al. Microbial inoculation in rice  
450 regulates antioxidative reactions and defense related genes to mitigate drought stress. *Scientific*  
451 *reports*. 2020;10(1):1-17.
- 452 40. Hasanuzzaman M, Bhuyan M, Zulfiqar F, Raza A, Mohsin SM, Mahmud JA, et al. Reactive oxygen  
453 species and antioxidant defense in plants under abiotic stress: revisiting the crucial role of a  
454 universal defense regulator. *Antioxidants & redox signaling*. 2020;9(8):681.

- 455 41. Sulman M, Fox G, Osman A, Inkerman A, Williams P, Michalowitz M, editors. Relationship  
456 between total peroxidase activity and susceptibility to black point in mature grain of some barley  
457 cultivars. Proceeding of the 10th Australian Barley Technical Symposium; 2001.
- 458 42. Maksimov I, Troshina N, Surina O, Cherepanova E. Salicylic acid increases the defense reaction  
459 against bunt and smut pathogens in wheat calli. *Journal of Plant Interactions*. 2014;9(1):306-14.
- 460 43. Hameed A, Naseer S, Iqbal T, Syed H, Haq MA. Effects of NaCl salinity on seedling growth,  
461 senescence, catalase and protease activities in two wheat genotypes differing in salt tolerance. *Pak*  
462 *J Bot*. 2008;40(3):1043-51.
- 463 44. Hameed A, Iqbal N, Malik SA. Mannose-induced modulations in antioxidants, protease activity,  
464 lipid peroxidation, and total phenolics in etiolated wheat leaves. *Journal of Plant Growth*  
465 *Regulation*. 2009;28(1):58-65.
- 466 45. Lagrimini LM, Vaughn J, Erb WA, Miller SA. Peroxidase overproduction in tomato: wound-  
467 induced polyphenol deposition and disease resistance. *Horticulture Science*. 1993;28(3):218-21.
- 468 46. Clarke SF, Guy PL, Burritt DJ, Jameson PE. Changes in the activities of antioxidant enzymes in  
469 response to virus infection and hormone treatment. *Physiologia Plantarum*. 2002;114(2):157-64.
- 470 47. Hameed A, Akhtar KP, Saleem MY, Asghar M. Correlative evidence for peroxidase involvement  
471 in disease resistance against *Alternaria* leaf blight of tomato. *Acta physiologiae plantarum*.  
472 2010;32(6):1171-6.
- 473 48. Amist N, Bano C, Singh NJMPASB, Biotechnology. Antioxidative Machinery for Redox  
474 Homeostasis During Abiotic Stress. 2019:65-90.
- 475 49. Rice-Evans C, Miller N, Paganga G. Antioxidant properties of phenolic compounds. *Trends in*  
476 *plant science*. 1997;2(4):152-9.

- 477 50. Ngadze E, Icishahayo D, Coutinho TA, Van der Waals JE. Role of polyphenol oxidase, peroxidase,  
478 phenylalanine ammonia lyase, chlorogenic acid, and total soluble phenols in resistance of potatoes  
479 to soft rot. *Plant Disease*. 2012;96(2):186-92.
- 480 51. Singh HP, Kaur S, Batish DR, Kohli RK. Ferulic acid impairs rhizogenesis and root growth, and  
481 alters associated biochemical changes in mung bean (*Vigna radiata*) hypocotyls. *Journal of Plant*  
482 *Interactions*. 2014;9(1):267-74.
- 483 52. Chatterjee A, Ghosh SKJBjopp. Alterations in biochemical components in mesta plants infected  
484 with yellow vein mosaic disease. 2008;20(4):267-75.
- 485 53. Benavente-García O, Castillo J, Marin FR, Ortuño A, Del Río JAJJoa, chemistry f. Uses and  
486 properties of citrus flavonoids. 1997;45(12):4505-15.
- 487 54. Di Ferdinando M, Brunetti C, Fini A, Tattini M. Flavonoids as antioxidants in plants under abiotic  
488 stresses. *Abiotic stress responses in plants*: Springer; 2012. p. 159-79.
- 489
- 490
- 491
- 492
- 493
- 494
- 495
- 496

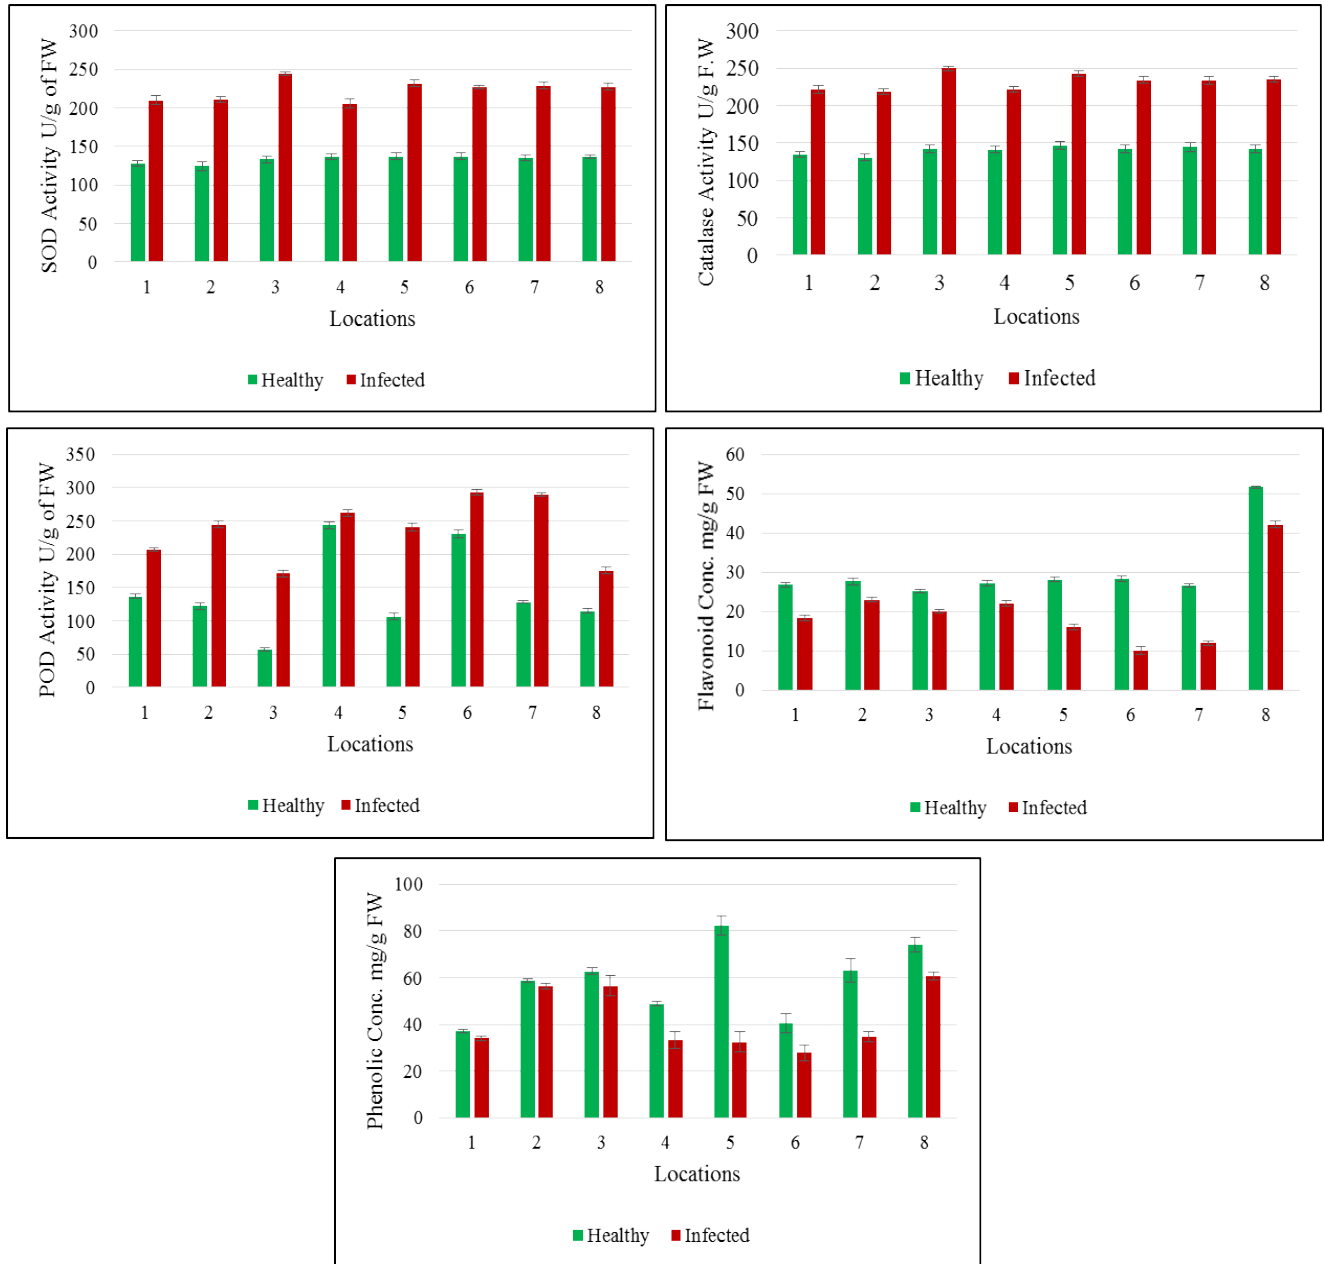

497

498

499 Figure 1. The graphical representation of antioxidant enzymes super oxide dismutase, catalase, peroxidase  
500 activity and antioxidant metabolites total flavonoids contents and total phenolic contents in the healthy and  
501 CLCuD infected leaves of cotton.

502



Table 1. Location of collected sample, physical condition of the plant, antioxidant enzymes superoxide dismutase, catalase and peroxidase in unit/g of fresh weight and antioxidant metabolites, total phenolic contents in equivalence of gallic acid (GAE) and total flavonoid contents in equivalence of quercetin (QE) from eight different locations in Punjab, Pakistan.

| Sample No. | Location                                            | Physical condition of cotton sample | Superoxide Dismutase (SOD) (Unit/g of FW) | Catalase (CAT) (Unit/g of FW) | Peroxidases (PODs) (Unit/g of FW) | Total phenolic contents (mg GAE/g. FW) | Total flavonoids contents (mg QE/g. FW) |
|------------|-----------------------------------------------------|-------------------------------------|-------------------------------------------|-------------------------------|-----------------------------------|----------------------------------------|-----------------------------------------|
| 1          | District Faisalabad<br>31°23'53.3"N<br>73°02'01.0"E | healthy                             | 123.62                                    | 129.58                        | 132.81                            | 35.60                                  | 25.62                                   |
| 2          |                                                     | healthy                             | 134.62                                    | 141.58                        | 133.52                            | 38.68                                  | 27.22                                   |
| 3          |                                                     | healthy                             | 125.16                                    | 133.12                        | 143.46                            | 37.28                                  | 27.52                                   |
| 4          |                                                     | infected                            | 215.76                                    | 226.53                        | 209.49                            | 32.10                                  | 18.42                                   |
| 5          |                                                     | infected                            | 216.57                                    | 228.34                        | 210.51                            | 35.25                                  | 16.92                                   |
| 6          |                                                     | infected                            | 197.53                                    | 210.30                        | 201.81                            | 35.04                                  | 19.52                                   |
| 7          | District Multan                                     | healthy                             | 114.16                                    | 124.65                        | 120.75                            | 58.91                                  | 26.52                                   |

|    |                                              |                                                 |         |        |        |       |       |
|----|----------------------------------------------|-------------------------------------------------|---------|--------|--------|-------|-------|
| 8  | 30°14'55.3"N                                 | healthy                                         | 124.46  | 128.40 | 132.50 | 57.72 | 29.22 |
| 9  | 71°35'20.3"E                                 | healthy                                         | 135.13  | 140.07 | 113.86 | 59.82 | 27.12 |
| 10 |                                              | infected                                        | 205.37  | 211.31 | 237.45 | 54.08 | 23.32 |
| 11 |                                              | infected                                        | 217.25  | 224.19 | 244.58 | 58.00 | 21.92 |
| 12 |                                              | infected                                        | 211.65  | 219.59 | 252.33 | 57.58 | 23.62 |
| 13 |                                              | District Multan<br>29°34'33.2"N<br>71°38'51.3"E | healthy | 124.46 | 132.69 | 59.90 | 60.66 |
| 14 | healthy                                      |                                                 | 134.86  | 144.09 | 52.38  | 65.42 | 24.43 |
| 15 | healthy                                      |                                                 | 140.71  | 150.94 | 60.91  | 62.13 | 25.62 |
| 16 | infected                                     |                                                 | 240.47  | 244.63 | 167.20 | 48.13 | 19.98 |
| 17 | infected                                     |                                                 | 245.35  | 250.51 | 164.85 | 60.73 | 20.62 |
| 18 | infected                                     |                                                 | 248.75  | 254.91 | 181.84 | 61.08 | 19.42 |
| 19 | Matila chowk<br>29°59'52.4"N<br>71°49'36.4"E | healthy                                         | 142.94  | 150.10 | 237.45 | 47.15 | 25.82 |
| 20 |                                              | healthy                                         | 133.46  | 141.62 | 239.41 | 49.67 | 27.42 |
| 21 |                                              | healthy                                         | 123.80  | 132.96 | 253.97 | 49.81 | 28.22 |
| 22 |                                              | infected                                        | 205.09  | 215.25 | 264.00 | 38.68 | 23.32 |
| 23 |                                              | infected                                        | 195.54  | 206.70 | 253.19 | 27.06 | 20.62 |

|    |                                                  |          |        |        |        |       |       |
|----|--------------------------------------------------|----------|--------|--------|--------|-------|-------|
| 24 |                                                  | infected | 215.31 | 227.47 | 268.78 | 34.20 | 21.92 |
| 25 | District Multan<br>30°06'19.0"N<br>71°37'41.3"E  | healthy  | 145.36 | 155.96 | 115.97 | 83.62 | 29.22 |
| 26 |                                                  | healthy  | 136.54 | 148.14 | 102.74 | 88.66 | 26.82 |
| 27 |                                                  | healthy  | 124.26 | 136.86 | 101.17 | 74.66 | 28.42 |
| 28 |                                                  | infected | 228.61 | 240.05 | 248.81 | 26.64 | 14.62 |
| 29 |                                                  | infected | 239.74 | 251.18 | 244.97 | 40.85 | 16.12 |
| 30 |                                                  | infected | 216.86 | 228.30 | 229.23 | 29.79 | 17.32 |
| 31 | District Lodhran<br>29°40'25.2"N<br>71°35'25.1"E | healthy  | 123.23 | 133.07 | 241.29 | 38.12 | 27.12 |
| 32 |                                                  | healthy  | 142.91 | 151.36 | 222.57 | 34.76 | 29.82 |
| 33 |                                                  | healthy  | 133.17 | 142.62 | 225.78 | 48.55 | 27.92 |
| 34 |                                                  | infected | 215.36 | 225.81 | 293.06 | 31.82 | 9.42  |
| 35 |                                                  | infected | 225.13 | 236.58 | 285.22 | 30.91 | 12.02 |
| 36 |                                                  | infected | 232.19 | 241.16 | 300.89 | 21.11 | 8.82  |
| 37 | District Lodhran<br>29°34'53.7"N<br>71°38'09.2"E | healthy  | 124.41 | 134.38 | 126.39 | 72.14 | 26.42 |
| 38 |                                                  | healthy  | 142.29 | 153.26 | 129.68 | 61.92 | 26.02 |
| 39 |                                                  | healthy  | 134.53 | 146.50 | 129.44 | 54.92 | 27.22 |

|    |                                                |          |        |        |        |       |       |
|----|------------------------------------------------|----------|--------|--------|--------|-------|-------|
| 40 |                                                | infected | 212.48 | 224.78 | 288.44 | 38.82 | 12.22 |
| 41 |                                                | infected | 236.69 | 243.07 | 286.79 | 32.59 | 10.92 |
| 42 |                                                | infected | 228.39 | 235.77 | 294.62 | 32.52 | 12.72 |
| 43 | District Jhang<br>30°37'00.9"N<br>71°40'28.5"E | healthy  | 124.47 | 131.85 | 107.91 | 68.64 | 52.02 |
| 44 |                                                | healthy  | 135.62 | 144.00 | 116.05 | 73.89 | 51.02 |
| 45 |                                                | healthy  | 140.88 | 150.26 | 119.42 | 79.70 | 51.82 |
| 46 |                                                | infected | 206.53 | 216.91 | 169.31 | 64.16 | 40.72 |
| 47 |                                                | infected | 235.74 | 241.38 | 185.05 | 58.70 | 42.32 |
| 48 |                                                | infected | 220.57 | 227.21 | 171.82 | 58.98 | 43.32 |

## Supplementary Data

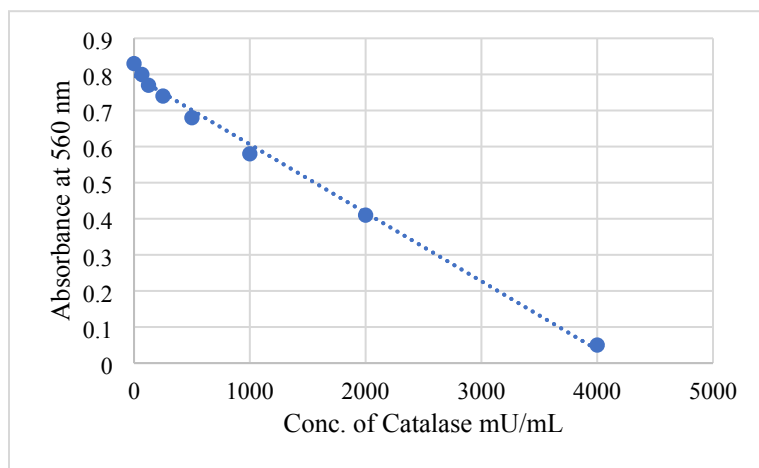

Figure S1. The Standard Curve for Catalase activity

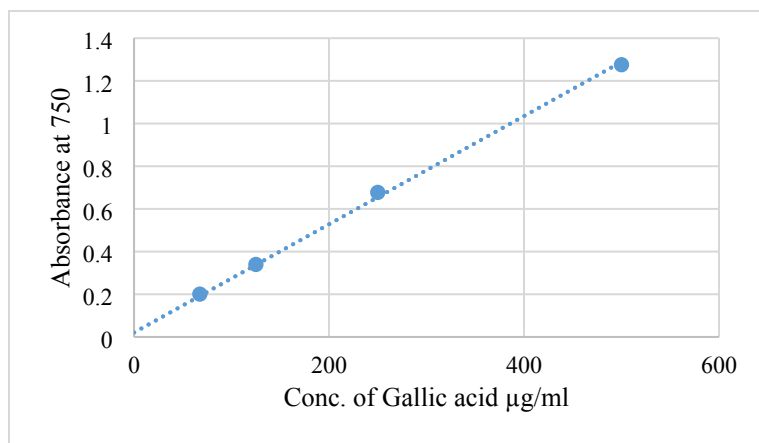

Figure S2. The Standard Curve for Gallic acid (GA) for quantification of total phenolic contents.

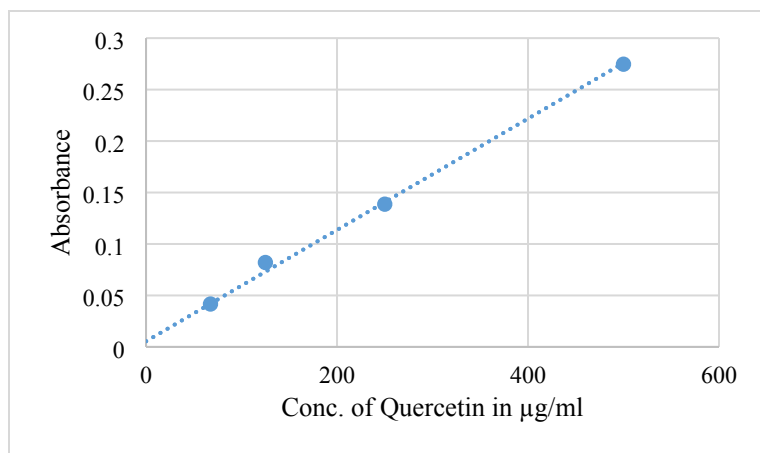

Figure S3. The Standard Curve for Quercetin for quantification of total flavonoid contents
